# Supplementary material for: Mixed Dye Removal Efficiency of Electrospun Polyacrylonitrile–Graphene Oxide Composite Membranes
Source: PubMed Central journal article supplement (PMC7563693; doi:10.3390/polym12092009), 2020-09-03
Supplement: polymers-12-02009-s001.pdf [file polymers-12-02009-s001.pdf]

## Supplementary Materials

### Mixed Dye Removal Efficiency of Electrospun Polyacrylonitrile–Graphene Oxide Composite Membranes

Wongi Jang <sup>1,2,†</sup>, Jaehan Yun <sup>1,2,†</sup>, Younggee Seo <sup>2</sup>, Hongsik Byun <sup>2</sup>, Jian Hou <sup>3,\*</sup> and Jun-Hyun Kim<sup>1,\*</sup>

<sup>1</sup> Department of Chemistry, Illinois State University, Normal, Illinois 61790-4160, USA; [wjang12@ilstu.edu](mailto:wjang12@ilstu.edu) (W.J.), [jyun12@ilstu.edu](mailto:jyun12@ilstu.edu) (J.Y.)

<sup>2</sup> Department of Chemical Engineering, Keimyung University, Daegu 42601, South Korea; [ygseo93@naver.com](mailto:ygseo93@naver.com) (Y.S.), [hsbyun@kmu.ac.kr](mailto:hsbyun@kmu.ac.kr) (H.B.)

<sup>3</sup> Department of Chemical Engineering, Zibo Vocational Institute, Zibo 255314, P. R. China

\* Correspondence: [houljimmy@naver.com](mailto:houljimmy@naver.com) (J.H.) and [jkim5@ilstu.edu](mailto:jkim5@ilstu.edu) (J.-H.K.)

† These authors equally contributed to this work

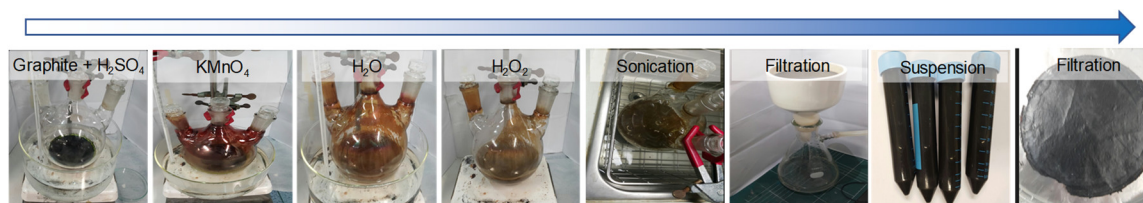

**Figure S1.** Preparation of GO via a modified Hummers' method.

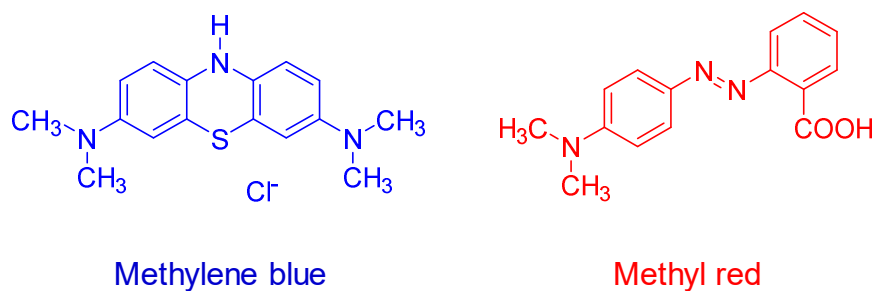

**Figure S2.** Structures of methylene blue (MB) and methyl red (MR).

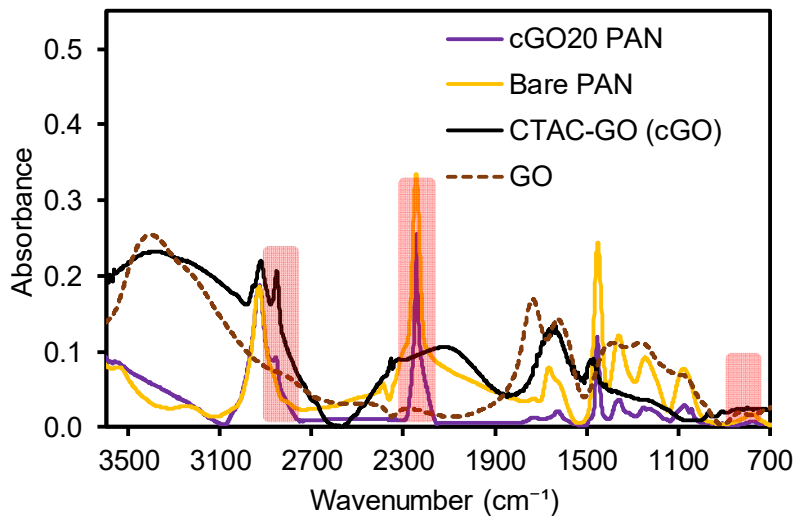

**Figure S3.** FT-IR spectra of GO, CTAC-modified GO (cGO), bare PAN, and cGO20 PAN composite nanofiber membranes (red highlights indicate the successful modification of GO with CTAC and their successful integration into the PAN nanofibers).

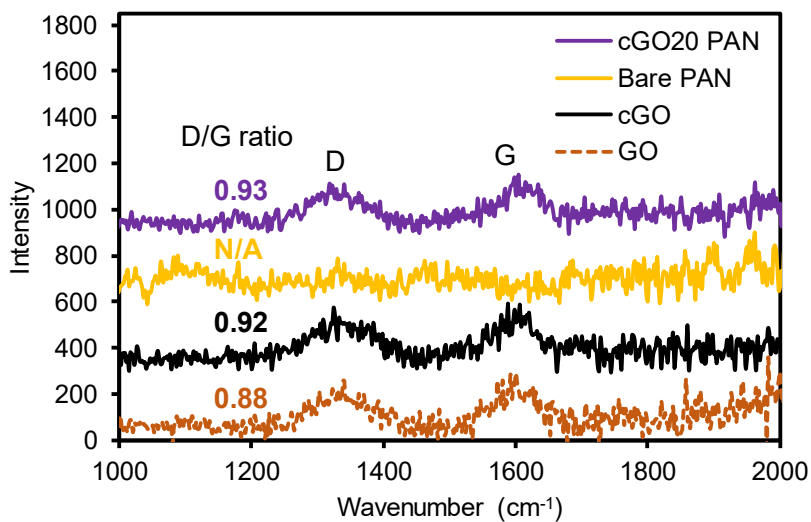

**Figure S4.** Raman spectra of GO, CTAC-modified GO (cGO), bare PAN, and cGO20 PAN composite nanofiber membrane.
